# Supplementary material
Source: HighWire-hosted journal article supplement (https://spcare.bmj.com/content/14/1/68)
Supplement: inline-supplementary-material-1 [file inline-supplementary-material-1.pdf]

## Contents

|                                                                                                                         |    |
|-------------------------------------------------------------------------------------------------------------------------|----|
| <b>Supplementary Table 1.</b> Two by two table .....                                                                    | 2  |
| <b>Supplementary Table 2.</b> Performance of the SQ to predict 1-year mortality among ambulatory patients with HF ..... | 2  |
| <b>Supplementary Figure 1.</b> Fagan's nomogram for women .....                                                         | 3  |
| <b>Supplementary Figure 2.</b> Fagan's nomogram for men .....                                                           | 4  |
| <b>Supplementary Figure 3.</b> Fagan's nomogram for those aged under 70 .....                                           | 5  |
| <b>Supplementary Figure 4.</b> Fagan's nomogram for those aged 70 or older .....                                        | 6  |
| <b>Supplementary Figure 5.</b> Fagan's nomogram for those with reduced ejection fraction (HFrEF) .....                  | 7  |
| <b>Supplementary Figure 6.</b> Fagan's nomogram for those with mildly reduced ejection fraction (HFmrEF) .....          | 8  |
| <b>Supplementary Figure 7.</b> Fagan's nomogram for those with preserved ejection fraction (HFpEF) .....                | 9  |
| <b>Supplementary Figure 8.</b> Fagan's nomogram for those at NYHA class I/II .....                                      | 10 |

Supplementary Table 1. Two by two table

|                   |   | 1-year mortality |            | Total     |
|-------------------|---|------------------|------------|-----------|
|                   |   | +                | -          |           |
| Surprise question | + | 17<br>a          | 66<br>b    | 83<br>a+b |
|                   | - | 3<br>c           | 88<br>d    | 91<br>c+d |
| Total             |   | 20<br>a+c        | 154<br>b+d | 174       |

Supplementary Table 2. Performance of the SQ to predict 1-year mortality among ambulatory patients with HF

|                                 |                                   |                                 |                                   |
|---------------------------------|-----------------------------------|---------------------------------|-----------------------------------|
| Sensitivity                     | 0.85<br>a/(a+c)                   | Specificity                     | 0.57<br>d/(d+b)                   |
| Positive Likelihood Ratio (+LR) | 1.98<br>Sensitivity/1-Specificity | Negative Likelihood Ratio (-LR) | 0.26<br>1-Sensitivity/Specificity |
| Positive Predictive Value (PPV) | 0.20<br>a/(a+b)                   | Negative Predictive Value (NPV) | 0.97<br>d/(c+d)                   |

Supplementary Figure 1. Fagan's nomogram for women

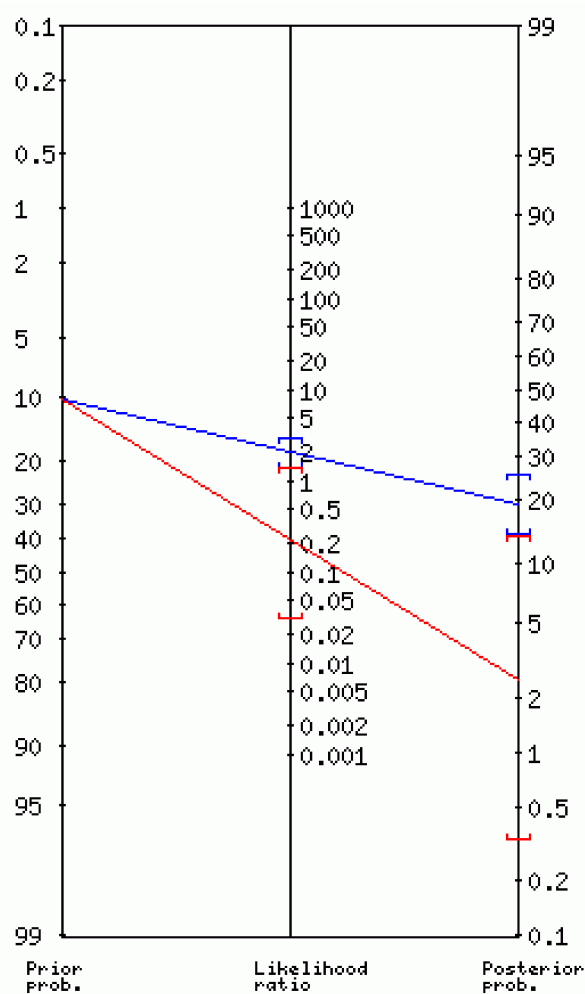

Based on a pre-test probability of dying within 1 year of 10%, the blue line shows a post-test probability of a patient with a positive Surprise Question (+SQ) dying within 1 year of 19% (95% CI, 14%-25%) according to the +LR of 2.04. A +SQ increases the probability of a patient dying within 1 year by 9 percentage points.

The red line shows a post-test probability of a patient with a negative SQ (-SQ) dying within one year of 2% (95% CI, 0%-14%) according to the negative likelihood ratio (-LR) of 0.22. A -SQ decreases the probability of a patient dying within 1 year by 8 percentage points.

Supplementary Figure 2. Fagan's nomogram for men

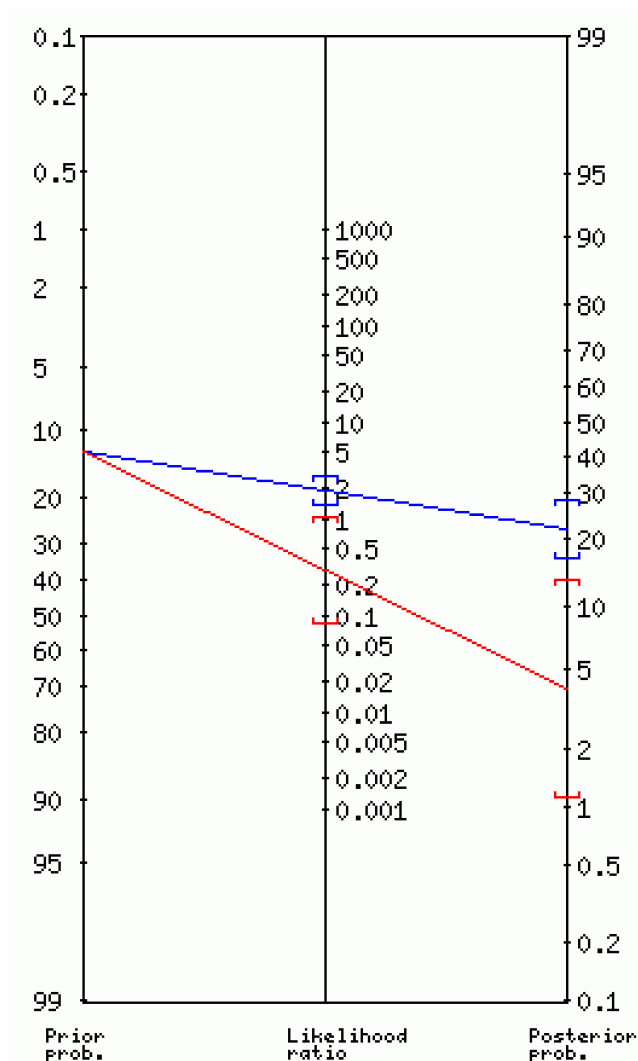

Based on a pre-test probability of dying within 1 year of 13%, the blue line shows a post-test probability of a patient with a positive Surprise Question (+SQ) dying within a year of 22% (95% CI, 16%-28%) according to a positive likelihood ratio (+LR) of 1.94. A +SQ increases the probability of a patient dying within 1 year by 9 percentage points. The red line shows a post-test probability of a patient with a negative SQ (-SQ) dying within a year of 4% (95% CI, 1%-13%) according to the negative LR (-LR) of 0.29. A -SQ decreases the probability of a patient dying within 1 year by 9 percentage points.

Supplementary Figure 3. Fagan's nomogram for those aged under 70

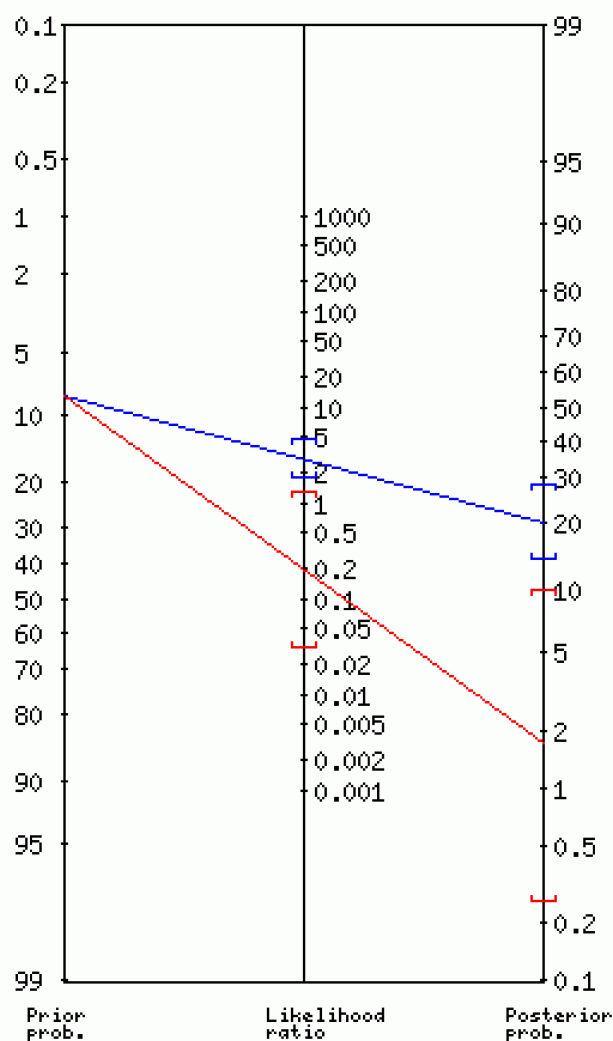

Based on a pre-test probability of dying within 1 year of 8%, the blue line shows a post-test probability of a patient with a positive Surprise Question (+SQ) dying within 1 year of 20% (95% CI, 14%-28%) according to the positive likelihood ratio (+LR) of 2.86. A +SQ increases the probability of a patient dying within 1 year by 12 percentage points. The red line shows a post-test probability of a patient with a negative SQ (-SQ) dying within a year of 2% (95% CI, 0%-10%) according to the negative LR (-LR) of 0.20. A -SQ decreases the probability of a patient dying within 1 year by 6 percentage points.

Supplementary Figure 4. Fagan's nomogram for those aged 70 or older

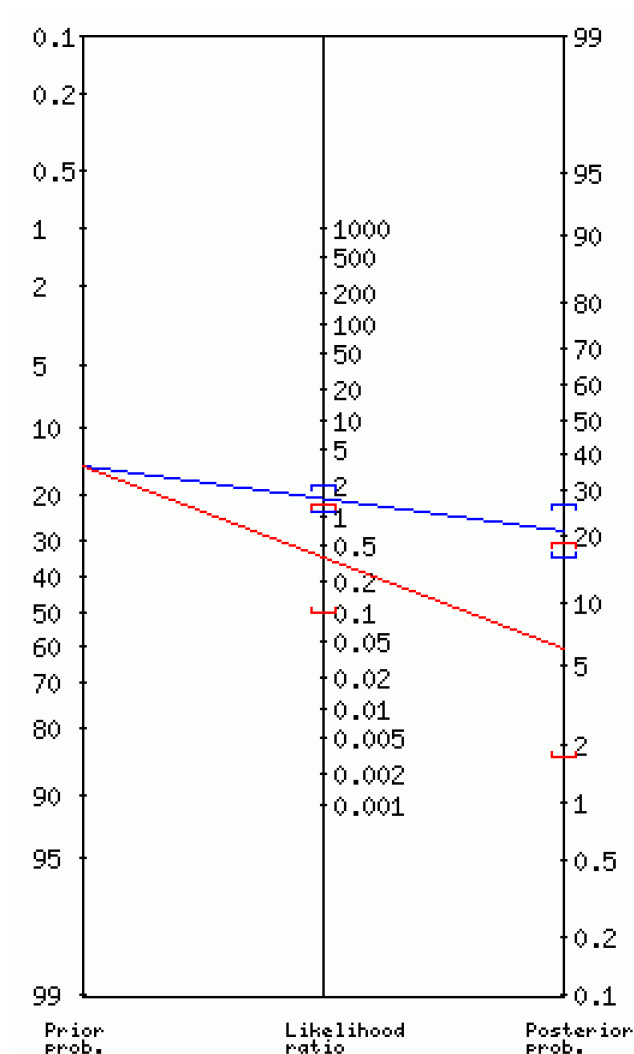

Based on a pre-test probability of dying within 1 year of 15%, the blue line shows a post-test probability of a patient with a positive Surprise Question (+SQ) dying within 1 year of 21% (95% CI, 16%-26%) according to the positive likelihood ratio (+LR) of 1.49. A +SQ increases the probability of a patient dying within 1 year by 6 percentage points. The red line shows a post-test probability of a patient with a negative SQ (-SQ) dying within a year of 6% (95% CI, 2%-19%) according to the negative LR (-LR) of 0.36. A -SQ decreases the probability of a patient dying within 1 year by 9 percentage points.

Supplementary Figure 5. Fagan's nomogram for those with reduced ejection fraction (HFrEF)

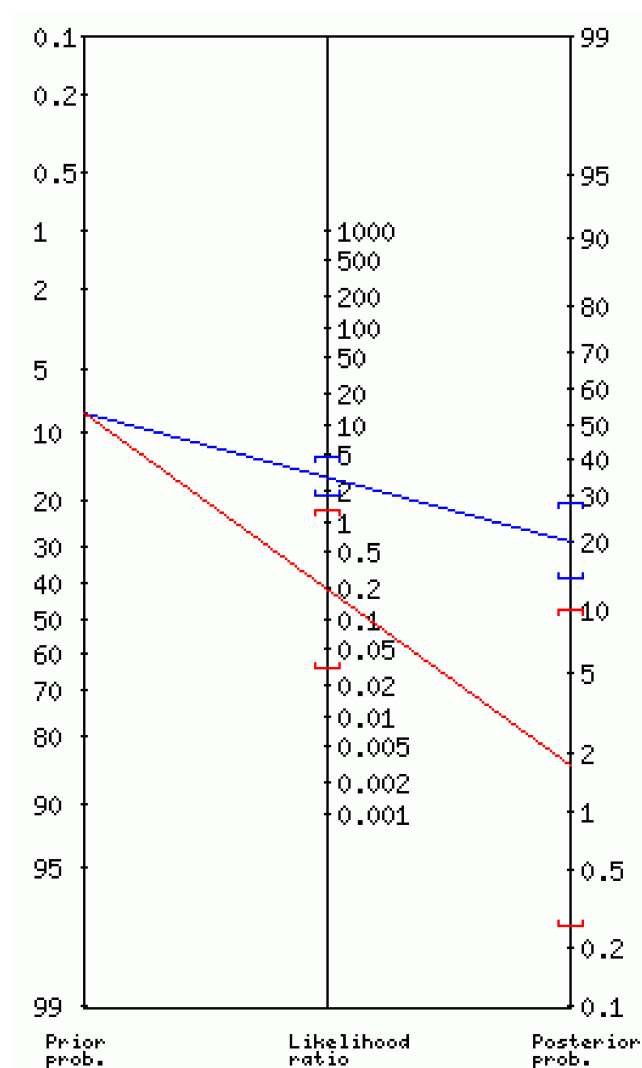

Based on a pre-test probability of dying within 1 year of 11%, the blue line shows a post-test probability of a patient with a positive Surprise Question (+SQ) dying within 1 year of 20% (95% CI, 16%-24%) according to the positive likelihood ratio (+LR) of 1.98. A +SQ increases the probability of a patient dying within 1 year by 9 percentage points. The red line shows a post-test probability of a patient with a negative SQ (-SQ) dying within a year of 2% (95% CI, 0%-11%) according to the negative LR (-LR) of 0.14. A -SQ decreases the probability of a patient dying within 1 year by 9 percentage points.

Supplementary Figure 6. Fagan's nomogram for those with mildly reduced ejection fraction (HFmrEF)



Based on a pre-test probability of dying within 1 year of 11%, the blue line shows a post-test probability of a patient with a positive Surprise Question (+SQ) dying within 1 year of 25% (95% CI, 10%-49%) according to the positive likelihood ratio (+LR) of 2.78. A +SQ increases the probability of a patient dying within 1 year by 14 percentage points. The red line shows a post-test probability of a patient with a negative SQ (-SQ) dying within a year of 5% (95% CI, 1%-21%) according to the negative LR (-LR) of 0.44. A -SQ decreases the probability of a patient dying within 1 year by 6 percentage points.



Supplementary Figure 7. Fagan's nomogram for those with preserved ejection fraction (HFpEF)

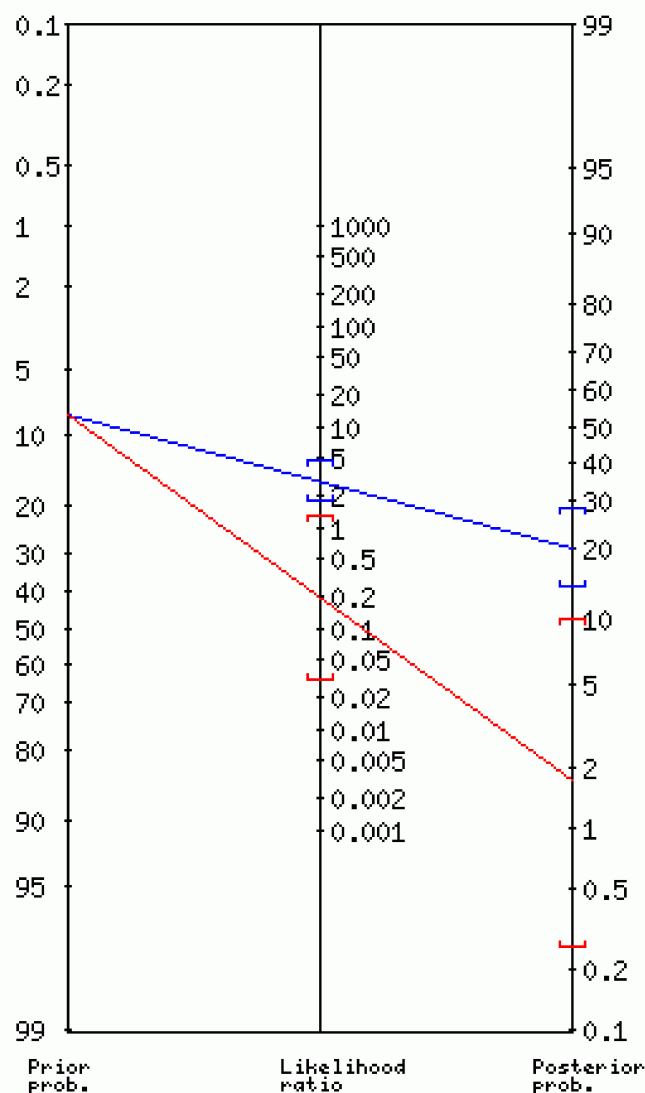

Based on a pre-test probability of dying within 1 year of 13%, the blue line shows a post-test probability of a patient with a positive Surprise Question (+SQ) dying within 1 year of 20% (95% CI, 11%-34%) according to the positive likelihood ratio (+LR) of 1.63. A +SQ increases the probability of a patient dying within 1 year by 7 percentage points. The red line shows a post-test probability of a patient with a negative SQ (-SQ) dying within a year of 7% (95% CI, 1%-29%) according to the negative LR (-LR) of 0.46. A -SQ decreases the probability of a patient dying within 1 year by 6 percentage points.

Supplementary Figure 8. Fagan's nomogram for those at NYHA class I/II

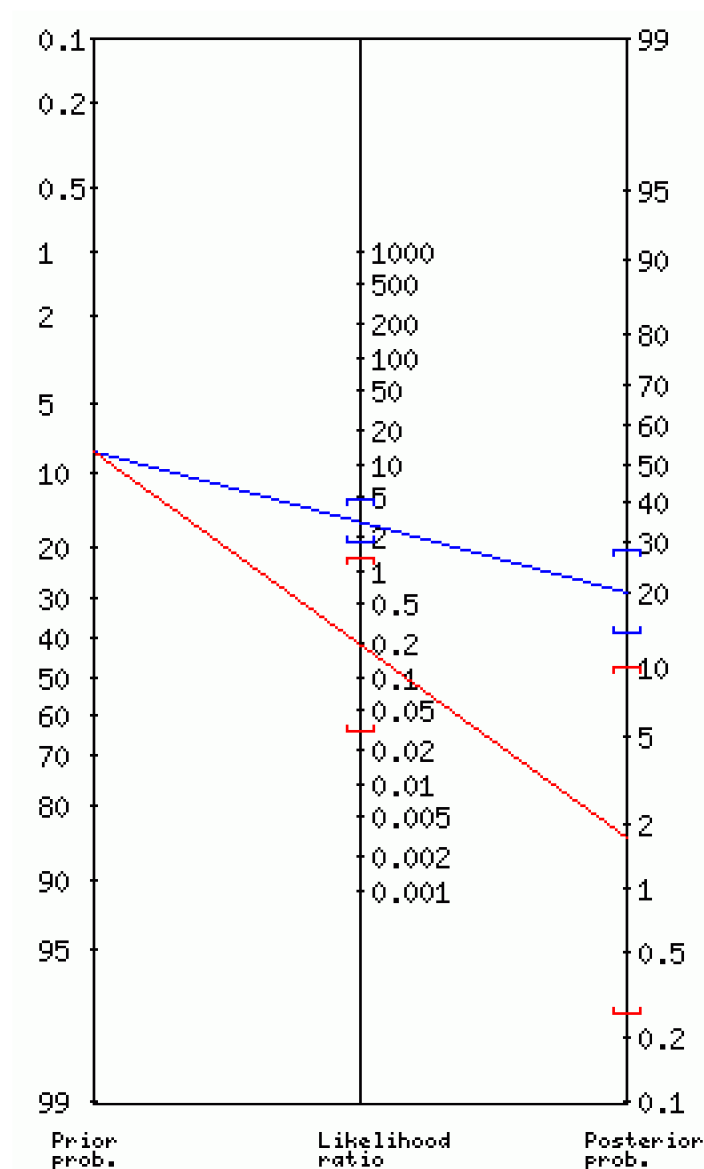

Based on a pre-test probability of dying within 1 year of 8%, the blue line shows a post-test probability of a patient with a positive Surprise Question (+SQ) dying within 1 year of 14% (95% CI, 10%-20%) according to the positive likelihood ratio (+LR) of 1.94. A +SQ increases the probability of a patient dying within 1 year by 6 percentage points. The red line shows a post-test probability of a patient with a negative SQ (-SQ) dying within a year of 4% (95% CI, 1%-9%) according to the negative LR (-LR) of 0.44. A -SQ decreases the probability of a patient dying within 1 year by 4 percentage points.
